# Supplementary material
Source: PubMed Central journal article supplement (PMC2614081)
Supplement: NIHMS84547-supplement-01.pdf [file NIHMS84547-supplement-01.pdf]

Supplemental Table 1

| Organism                                             | Organism Taxonomic group | Group  | Genomic Context                                 | Genome or contig #                | Size (Kb) | Position of ends   |                    | Protein #                                                                                                                                                                                        |
|------------------------------------------------------|--------------------------|--------|-------------------------------------------------|-----------------------------------|-----------|--------------------|--------------------|--------------------------------------------------------------------------------------------------------------------------------------------------------------------------------------------------|
|                                                      |                          |        |                                                 |                                   |           | Right              | Left               |                                                                                                                                                                                                  |
| <i>Escherichia coli</i>                              | Gammaproteobacteria      | A      | plasmid, <i>attTn7</i>                          | <a href="#">NC_002525</a>         | 14        | 24497              | 10431              | TnsA NP_065320.1<br>TnsB NP_065319.1<br>TnsC NP_065318.1<br>TnsD NP_065317.1<br>TnsE NP_065316                                                                                                   |
| <i>Acinetobacter baumannii (SDF)</i>                 | Gammaproteobacteria      | A      | <i>attTn7</i>                                   | <a href="#">NC_010400</a>         | 35        | 3310924            | 3276082            | TnsA CAP02825.1<br>TnsB CAP02824.1<br>TnsC CAP02823.1<br>TnsD CAP02822.1<br>TnsE CAP02821.1                                                                                                      |
| <i>Aeromonas salmonicida subsp. salmonicida A449</i> | Gammaproteobacteria      | A      | <i>attTn7</i>                                   | <a href="#">NC_009348</a>         | 21        | 4646261            | 4625451            | TnsA YP_001144004.1<br>TnsB YP_001144003.1<br>TnsC YP_001144002.1<br>TnsD pseudo(gj145297124)<br>TnsE YP_001143999                                                                               |
| <i>Shewanella loihica PV-4</i>                       | Gammaproteobacteria      | A      | <i>attTn7</i>                                   | <a href="#">NC_009092</a>         | 21        | 4568999            | 4548024            | TnsA YP_001095953.1<br>TnsB YP_001095952.1<br>TnsC YP_001095951.1<br>TnsD YP_001095950.1<br>TnsE YP_001095949                                                                                    |
| <i>Acinetobacter baumannii ATCC 17978</i>            | Gammaproteobacteria      | A      | chromosome, non- <i>attTn7</i>                  | <a href="#">NC_009085</a>         | 45        | 2944622            | 2989589            | TnsA YP_001085569.1<br>TnsB YP_001085570.1<br>TnsC YP_001085571.1<br>TnsD YP_001085572.1, YP_001085574.1<br>TnsE YP_001085575                                                                    |
| <i>Moritella sp. PE36</i>                            | Gammaproteobacteria      | A      | <i>attTn7</i>                                   | <a href="#">NZ_ABCQ01000022.1</a> | 32        | 18747              | 51006              | TnsA ZP_01898871.1<br>TnsB ZP_01898872.1<br>TnsC ZP_01898873.1<br>TnsD ZP_01898874.1<br>TnsE ZP_01898875                                                                                         |
| <i>Idiomarina loihiensis L2TR</i>                    | Gammaproteobacteria      | A      | <i>attTn7</i>                                   | <a href="#">NC_006512</a>         | 16        | 2816674            | 2800435            | TnsA YP_156994.1<br>TnsB YP_156993.1<br>TnsC YP_156992.1<br>TnsD YP_156991.1<br>TnsE YP_156990                                                                                                   |
| <i>Photobacterium sp. SKA34</i>                      | Gammaproteobacteria      | A      | <i>attTn7</i>                                   | <a href="#">NZ_AAOU01000022.1</a> | ND        | ND                 | ND                 | TnsA ZP_01161191.1<br>TnsB ZP_01161192.1<br>TnsC ZP_01161193.1<br>TnsD ZP_01161194.1                                                                                                             |
| <i>Shewanella baltica OS155</i>                      | Gammaproteobacteria      | A<br>C | <i>attTn7</i><br>chromosome, non- <i>attTn7</i> | <a href="#">NC_009052</a>         | 24<br>ND  | 5103538<br>ND      | 5079635<br>ND      | TnsA YP_001052690.1, YP_001052657.1<br>TnsB YP_001052689.1, YP_001052656.1<br>TnsC YP_001052688.1, YP_001052652.1<br>TnsD YP_001052687.1, YP_001052651.1<br>TnsE YP_001052686                    |
| <i>Shewanella putrefaciens CN-32</i>                 | Gammaproteobacteria      | A      | <i>attTn7</i>                                   | <a href="#">NC_009438</a>         | 21<br>19  | 4596246<br>4575365 | 4575371<br>4556489 | TnsA YP_001185451.1, pseudo(gj146291111)<br>TnsB YP_001185450.1, YP_001185440.1<br>TnsC YP_001185449.1, YP_001185439.1<br>TnsD YP_001185448.1, YP_001185436.1<br>TnsE YP_001185447, YP_001185435 |
| <i>Shewanella putrefaciens 200</i>                   | Gammaproteobacteria      | A      | <i>attTn7</i>                                   | <a href="#">NZ_AAWY01000023.1</a> | unknown   | ctg127,12083       | ctg126,3652        | TnsA ZP_01706553.1<br>TnsB ZP_01706552.1<br>TnsC ZP_01706551.1<br>TnsD ZP_01706550.1<br>TnsE ZP_01706608                                                                                         |
| <i>Hahella chejuensis KCTC 2396</i>                  | Gammaproteobacteria      | A      | <i>attTn7</i>                                   | <a href="#">NC_007645</a>         | 46        | 7193132            | 7147046            | TnsA YP_438104.1<br>TnsB YP_438103.1<br>TnsC YP_438102.1<br>TnsD YP_438101.1<br>TnsE YP_438100                                                                                                   |
| <i>Acidithiobacillus ferrooxidans ATCC 2327C</i>     | Gammaproteobacteria      | B<br>B | <i>attTn7</i><br>chromosome, non- <i>attTn7</i> | <a href="#">CMR-TIGR:243159</a>   | 31<br>39  | 1762162<br>2900824 | 1731108<br>2939832 | TnsA AFE1880, AFE3133<br>TnsB AFE1879, AFE3134<br>TnsC AFE1878, AFE3133                                                                                                                          |

|                                             |                      |   |                                |                                   |         |         |         |      |                                                                           |                  |
|---------------------------------------------|----------------------|---|--------------------------------|-----------------------------------|---------|---------|---------|------|---------------------------------------------------------------------------|------------------|
|                                             |                      |   |                                |                                   |         |         |         |      | TnsD                                                                      | AFE1877, AFE3132 |
|                                             |                      |   |                                |                                   |         |         |         |      | TnsE                                                                      | AFE1876, AFE3131 |
| <i>Rhodobacteriales bacterium H1CC225t</i>  | Alphaproteobacteria  | A | <i>attTn7</i>                  | <a href="#">NZ_AAAT01000005.1</a> | ND      | ND      | ND      | TnsA | YP_01448252.1                                                             |                  |
|                                             |                      |   |                                |                                   |         |         |         | TnsB | YP_01448253.1                                                             |                  |
|                                             |                      |   |                                |                                   |         |         |         | TnsC | YP_01448254.1                                                             |                  |
|                                             |                      |   |                                |                                   |         |         |         | TnsD | YP_01448255.1                                                             |                  |
| <i>Vibrionales bacterium SWAT-3</i>         | Gamma proteobacteria | A | <i>attTn7</i>                  | <a href="#">NZ_AAZW01000012.1</a> | 11      | 116600  | 105729  | TnsA | YP_01813510.1, YP_01815428.1, YP_01813648.1, YP_01814066.1                |                  |
|                                             |                      | A | chromosome, non- <i>attTn7</i> | <a href="#">NZ_AAZW01000014</a>   | 11      | 38142   | 27364   | TnsB | YP_01813509.1, YP_01815427.1, YP_01813647.1, YP_01814065.1                |                  |
|                                             |                      | A | chromosome, non- <i>attTn7</i> | <a href="#">NZ_AAZW01000044</a>   | unknown | 39675   | unknown | TnsC | YP_01813508.1, YP_01815426.1, YP_01813646.1, YP_01814064.1                |                  |
|                                             |                      | A | chromosome, non- <i>attTn7</i> | <a href="#">NZ_AAZW01000019</a>   | 11      | 38129   | 27352   | TnsD | YP_01813507.1, YP_01815424.1, YP_01815425.1, YP_01813645.1, YP_01814063.1 |                  |
|                                             |                      |   |                                |                                   |         |         |         | TnsE | YP_01813506, YP_01815423.1, YP_01813644.1, YP_01814062.1                  |                  |
| <i>Anabaena variabilis ATCC 2941t</i>       |                      | A | <i>attTn7</i>                  | <a href="#">NC_007413</a>         | 26      | 4324033 | 4349748 | TnsA | YP_323988.1                                                               |                  |
|                                             |                      |   |                                |                                   |         |         |         | TnsB | YP_323989.1                                                               |                  |
|                                             |                      |   |                                |                                   |         |         |         | TnsC | YP_323990.1                                                               |                  |
|                                             |                      |   |                                |                                   |         |         |         | TnsD | YP_323991.1, YP_323997.1                                                  |                  |
| <i>Pelobacter carbinolicus DSM 2380</i>     | Deltaproteobacteria  | A | <i>attTn7</i>                  | <a href="#">NC_007498</a>         | 25      | 3428955 | 3403982 | TnsA | YP_358337.1                                                               |                  |
|                                             |                      |   |                                |                                   |         |         |         | TnsB | YP_358336.1                                                               |                  |
|                                             |                      |   |                                |                                   |         |         |         | TnsC | YP_358335.1                                                               |                  |
|                                             |                      |   |                                |                                   |         |         |         | TnsD | YP_358327.1                                                               |                  |
|                                             |                      |   |                                |                                   |         |         |         | TnsE | YP_358326                                                                 |                  |
| <i>Marinobacter sp. ELB17</i>               | Gamma proteobacteria | A | <i>attTn7</i>                  | <a href="#">NZ_AAXY01000016.1</a> | ND      | ND      | ND      | TnsA | YP_01738582.1                                                             |                  |
|                                             |                      |   |                                |                                   |         |         |         | TnsB | YP_01738583.1                                                             |                  |
|                                             |                      |   |                                |                                   |         |         |         | TnsC | YP_01738584.1                                                             |                  |
|                                             |                      |   |                                |                                   |         |         |         | TnsD | YP_01738598.1                                                             |                  |
|                                             |                      |   |                                |                                   |         |         |         | TnsE | YP_01738599                                                               |                  |
| <i>Bacillus cereus ATCC 10987</i>           | Firmicutes           | B | <i>attTn7</i>                  | <a href="#">NC_003909</a>         | 27      | 159705  | 187174  | TnsA | NP_976510.1, NP_976502.1                                                  |                  |
|                                             |                      | B | <i>attTn7</i>                  |                                   | 11      | 187178  | 198135  | TnsB | NP_976511.1, NP_976503.1                                                  |                  |
|                                             |                      |   |                                |                                   |         |         |         | TnsC | NP_976512.1, NP_976504.1                                                  |                  |
|                                             |                      |   |                                |                                   |         |         |         | TnsD | NP_976513.1, NP_976505.1, AAS39114.1                                      |                  |
|                                             |                      |   |                                |                                   |         |         |         | TnsE | NP_976514                                                                 |                  |
| <i>Staphylococcus sp. 693-2</i>             | Firmicutes           | B | plasmid, pLEW6932              | <a href="#">NC_009130</a>         | 14      | 30744   | 17105   | TnsA | YP_001096301.1                                                            |                  |
|                                             |                      |   |                                |                                   |         |         |         | TnsB | YP_001096300.1                                                            |                  |
|                                             |                      |   |                                |                                   |         |         |         | TnsC | YP_001096299.1                                                            |                  |
|                                             |                      |   |                                |                                   |         |         |         | TnsD | YP_001096298.1                                                            |                  |
|                                             |                      |   |                                |                                   |         |         |         | TnsE | YP_001096297                                                              |                  |
| <i>Herpetosiphon aurantiacus ATCC 23779</i> | Chloroflexi          | B | <i>attTn7</i>                  | <a href="#">NC_009972</a>         | ND      | ND      | ND      | TnsA | YP_001546711.1                                                            |                  |
|                                             |                      |   |                                |                                   |         |         |         | TnsB | pseudo(gij159896533)                                                      |                  |
|                                             |                      |   |                                |                                   |         |         |         | TnsC | YP_001546712.1                                                            |                  |
|                                             |                      |   |                                |                                   |         |         |         | TnsD | YP_001546713.1, YP_001546716.1                                            |                  |
| <i>Clostridium thermocellum ATCC 27405</i>  | Firmicutes           | B | chromosome, non- <i>attTn7</i> | <a href="#">NC_009012</a>         | ND      | ND      | ND      | TnsA | YP_001037542.1, YP_001038290.1                                            |                  |
|                                             |                      | B | chromosome, non- <i>attTn7</i> |                                   | ND      | ND      | ND      | TnsB | YP_001037541.1, YP_001038287.1                                            |                  |
|                                             |                      |   |                                |                                   |         |         |         | TnsC | YP_001037540.1, YP_001038286.1                                            |                  |
|                                             |                      |   |                                |                                   |         |         |         | TnsD | YP_001037539.1, YP_001038285.1                                            |                  |
| <i>Burkholderia phymatum STM815</i>         | Beta proteobacteria  | C | chromosome, non- <i>attTn7</i> | <a href="#">NC_010623</a>         | ND      | ND      | ND      | TnsA | YP_01505407.1, YP_01500254.1                                              |                  |
|                                             |                      | C | chromosome, non- <i>attTn7</i> |                                   | ND      | ND      | ND      | TnsB | YP_01505406.1, YP_01500253.1                                              |                  |
|                                             |                      |   |                                |                                   |         |         |         | TnsC | YP_01505405.1, YP_01500252.1                                              |                  |
|                                             |                      |   |                                |                                   |         |         |         | TnsD | YP_01505404.1, YP_01505428.1                                              |                  |
| <i>Bacillus cereus H3081.97</i>             | Firmicutes           | B | <i>attTn7</i>                  | <a href="#">NZ_ABDL01000038.1</a> | 12      | 24658   | 36935   | TnsA | YP_02598971.1                                                             |                  |
|                                             |                      |   |                                |                                   |         |         |         | TnsB | YP_02598972.1                                                             |                  |
|                                             |                      |   |                                |                                   |         |         |         | TnsC | YP_02598973.1                                                             |                  |
|                                             |                      |   |                                |                                   |         |         |         | TnsD | YP_323997.1                                                               |                  |
|                                             |                      |   |                                |                                   |         |         |         | TnsE | YP_02598974                                                               |                  |
| <i>Pseudomonas fluorescens Pf0-1</i>        | Gamma proteobacteria | C | <i>attTn7</i>                  | <a href="#">NC_007492</a>         | ND      | ND      | ND      | TnsA | YP_351449.1                                                               |                  |
|                                             |                      |   |                                |                                   |         |         |         | TnsB | YP_351448.1                                                               |                  |
|                                             |                      |   |                                |                                   |         |         |         | TnsC | YP_351447.1                                                               |                  |
|                                             |                      |   |                                |                                   |         |         |         | TnsD | YP_351446.1, YP_351445.1                                                  |                  |
| <i>Herminimonas arsenicoxydans</i>          | Beta proteobacteria  | C | chromosome, non- <i>attTn7</i> | <a href="#">NC_009138</a>         | ND      | ND      | ND      | TnsA | YP_001100471.1                                                            |                  |
|                                             |                      |   |                                |                                   |         |         |         | TnsB | YP_001100472.1                                                            |                  |
|                                             |                      |   |                                |                                   |         |         |         | TnsC | YP_001100473.1                                                            |                  |
|                                             |                      |   |                                |                                   |         |         |         | TnsD | YP_001100474.1                                                            |                  |
| <i>Nostoc punctiforme PCC 73102</i>         | Cyanobacterium       | B | chromosome, non- <i>attTn7</i> | <a href="#">NZ_AAAY02000030.1</a> | ND      | ND      | ND      | TnsA | YP_00109788.1                                                             |                  |
|                                             |                      |   |                                |                                   |         |         |         | TnsB | YP_00109790.1                                                             |                  |
|                                             |                      |   |                                |                                   |         |         |         | TnsC | YP_00109791.2                                                             |                  |
|                                             |                      |   |                                |                                   |         |         |         | TnsD | YP_00109794.2                                                             |                  |
| <i>Clostridium butyricum 5521</i>           | Firmicutes           | B | <i>attTn7</i>                  | <a href="#">NZ_ABDT01000003.2</a> | 6       | 70986   | 77464   | TnsA | YP_02623272.1, YP_02623267.1, YP_02623280.1                               |                  |
|                                             |                      | B |                                |                                   | 15      | 77464   | 92891   | TnsB | YP_02623273.1, YP_02623268.1, YP_02623281.1                               |                  |
|                                             |                      | B |                                |                                   | 16      | 92896   | 109130  | TnsC | YP_02623274.1, YP_02623282.1,                                             |                  |

|                                                             |                     |   |                           |                                   |         |        |         |                                      |                                                                                      |
|-------------------------------------------------------------|---------------------|---|---------------------------|-----------------------------------|---------|--------|---------|--------------------------------------|--------------------------------------------------------------------------------------|
|                                                             |                     |   |                           |                                   | unknown | 109135 | unknown | TnsD<br>TnsE                         | ZP_02623275.1, ZP_02623276.1, ZP_02623283.1<br>ZP_02623284.1                         |
| <i>Escherichia coli</i> APEC O1                             | Gammaproteobacteria | C | plasmid, pAPEC-01-R       | <a href="#">NC_009838</a>         | 33      | 109006 | 142480  | TnsA<br>TnsB<br>TnsC<br>TnsD         | ABF67781.1<br>ABF67782.1<br>ABF67783.1<br>ABF67784.1                                 |
| <i>Serratia marcescens</i>                                  | Gammaproteobacteria | C | plasmid, R478             | <a href="#">NC_005211</a>         | 32      | 114733 | 147141  | TnsA<br>TnsB<br>TnsC<br>TnsD         | NP_941203.1<br>NP_941204.1<br>NP_941205.1<br>NP_941206.1                             |
| <i>Ralstonia metallidurans</i> CH34                         | Betaproteobacteria  | C | chromosome II, non-attTn7 | <a href="#">NC_007974</a>         | ND      | ND     | ND      | TnsA<br>TnsB<br>TnsC<br>TnsD         | YP_587587.1<br>YP_587586.1<br>YP_587585.1<br>YP_585913.1, YP_585912                  |
| <i>Natronaerobius thermophilus</i> JW/NM-WN-LF              | Firmicutes          | B | attTn7                    | <a href="#">NZ_ABKR01000020.1</a> | ND      | ND     | ND      | TnsA<br>TnsB<br>TnsC<br>TnsD<br>TnsE | ZP_02853428.1<br>ZP_02853427.1<br>ZP_02853426.1<br>ZP_02853425<br>ZP_02853424        |
| <i>Photobacterium</i> sp. SKA34                             | Gammaproteobacteria | C | chromosome, non-attTn7    | <a href="#">NZ_AAQU01000013.1</a> | ND      | ND     | ND      | TnsA<br>TnsB<br>TnsC<br>TnsD         | ZP_01160363.1<br>ZP_01160362.1<br>ZP_01160359.1<br>ZP_01160358.1                     |
| <i>Hermiimonas arsenicoxydans</i>                           | Betaproteobacteria  | C | chromosome, non-attTn7    | <a href="#">NC_009138</a>         | ND      | ND     | ND      | TnsA<br>TnsB<br>TnsC<br>TnsD         | YP_001101453.1<br>YP_001101452.1<br>YP_001101451.1<br>YP_001101450.1, YP_001101449.1 |
| <i>Aeromonas salmonicida</i> subsp. <i>salmonicida</i> A449 | Gammaproteobacteria | C | chromosome, non-attTn7    | <a href="#">NC_009349</a>         | ND      | ND     | ND      | TnsA<br>TnsB<br>TnsC<br>TnsD         | YP_001144065.1<br>YP_001144064.1<br>YP_001144063.1<br>YP_001144060.1                 |
| <i>Janthinobacterium</i> sp. <i>Marseille</i>               | Betaproteobacteria  | C | chromosome, non-attTn7    | <a href="#">NC_009659</a>         | ND      | ND     | ND      | TnsA<br>TnsB<br>TnsC<br>TnsD         | YP_001355144.1<br>YP_001355143.1<br>YP_001355142.1<br>YP_001355141.1, YP_001355140.1 |
| <i>Psychromonas ingrahamii</i> 37                           | Gammaproteobacteria | C | chromosome, non-attTn7    | <a href="#">NC_008709</a>         | ND      | ND     | ND      | TnsA<br>TnsB<br>TnsC<br>TnsD         | YP_944405.1<br>YP_944404.1<br>YP_944403.1<br>YP_944401.1                             |
| <i>Rhodoferrax ferrireducens</i> T118                       | Betaproteobacteria  | C | chromosome, non-attTn7    | <a href="#">NC_007908</a>         | ND      | ND     | ND      | TnsA<br>TnsB<br>TnsC<br>TnsD         | YP_522441.1<br>YP_522442.1<br>YP_522443.1<br>YP_522444.1, YP_522330.1, YP_522329.1   |
| <i>Vibrio cholerae</i> RC385                                | Gammaproteobacteria | C | chromosome, non-attTn7    | <a href="#">DS265382.1</a>        | ND      | ND     | ND      | TnsA<br>TnsB<br>TnsC<br>TnsD         | EDN12385.1<br>EDN12384.1<br>EDN12383.1<br>EDN12382.1                                 |
| <i>Alteromonadales bacterium</i> TW-7                       | Gammaproteobacteria | C | chromosome, non-attTn7    | <a href="#">NZ_AAVS01000026.1</a> | ND      | ND     | ND      | TnsA<br>TnsB<br>TnsC<br>TnsD         | ZP_01614175.1<br>ZP_01614176.1<br>ZP_01614177.1<br>ZP_01614179.1                     |
| <i>Burkholderia cenocepacia</i> MC0-3                       | Betaproteobacteria  | C | chromosome, non-attTn7    | <a href="#">NZ_AAVA01000005.1</a> | ND      | ND     | ND      | TnsA<br>TnsB<br>TnsC<br>TnsD         | ZP_01562008.1<br>ZP_01562105.1<br>ZP_01562007.1<br>ZP_01562104.1                     |
| <i>Bacteroides capillosus</i> ATCC 29796                    | Bacteroidetes       | C | chromosome, non-attTn7    | <a href="#">NZ_AAXG02000042.1</a> | ND      | ND     | ND      | TnsA<br>TnsB<br>TnsC<br>TnsD         | ZP_02038365.1<br>ZP_02038364.1<br>ZP_02038363.1<br>ZP_02038362.1                     |
